# Supplementary material
Source: PubMed Central journal article supplement (PMC5651191)

Supplemental File:  
Normal Eyes OCT Angiograms

# Normal SVC Case 1

Angiogram

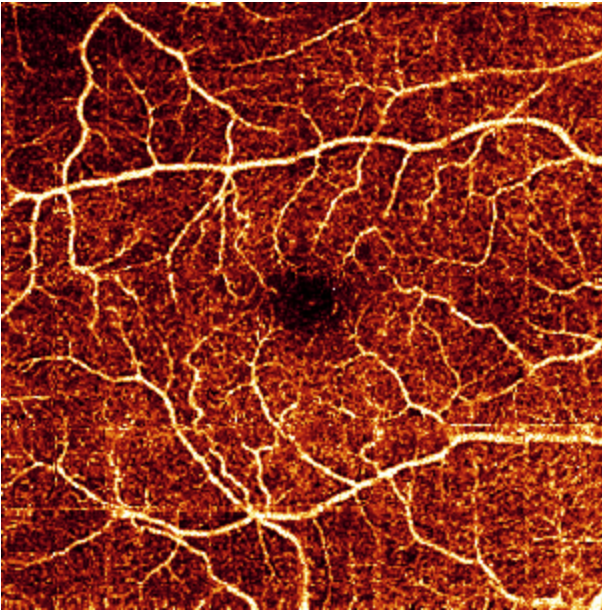

Binarized image used to calculate vessel density

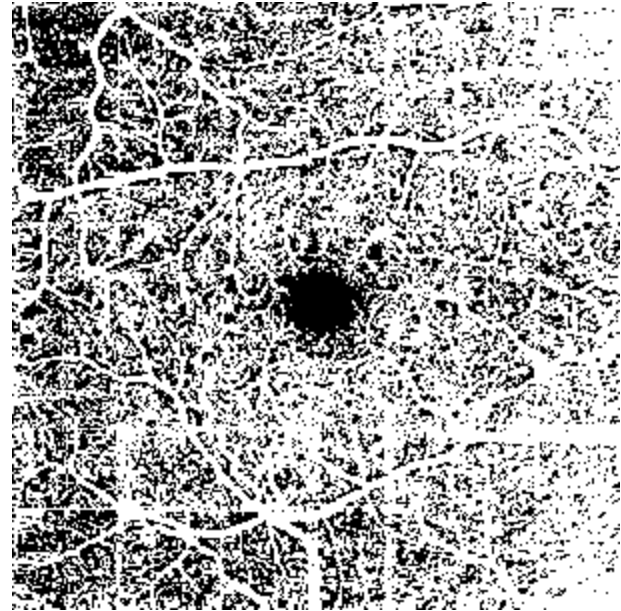

# Normal SVC Case 2

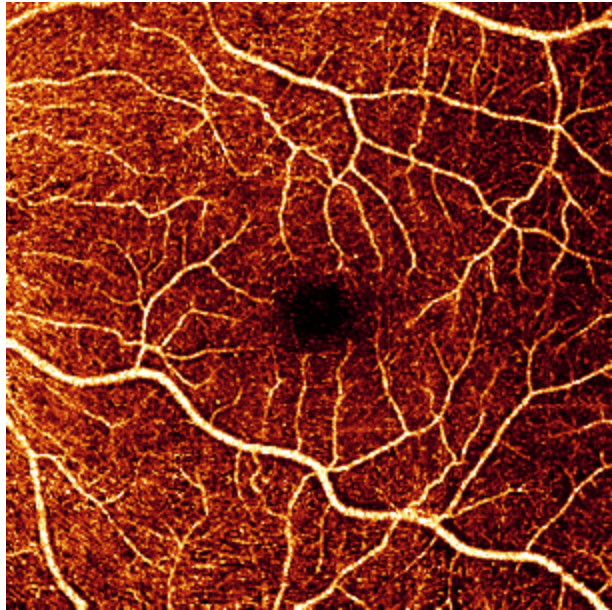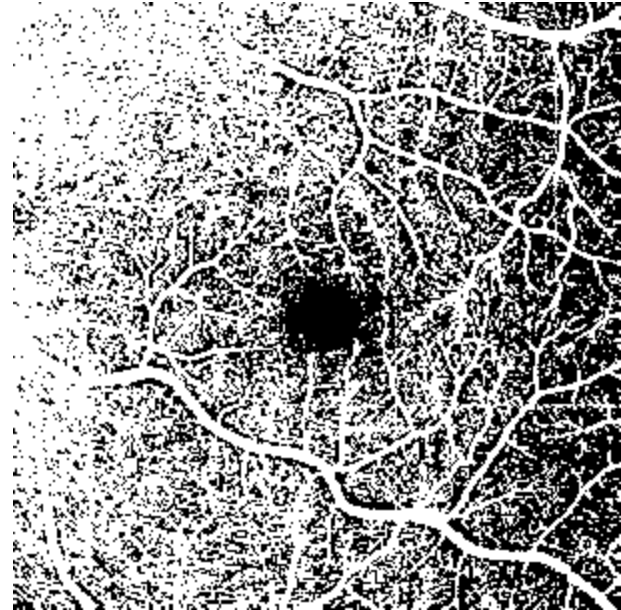

# Normal SVC Case3

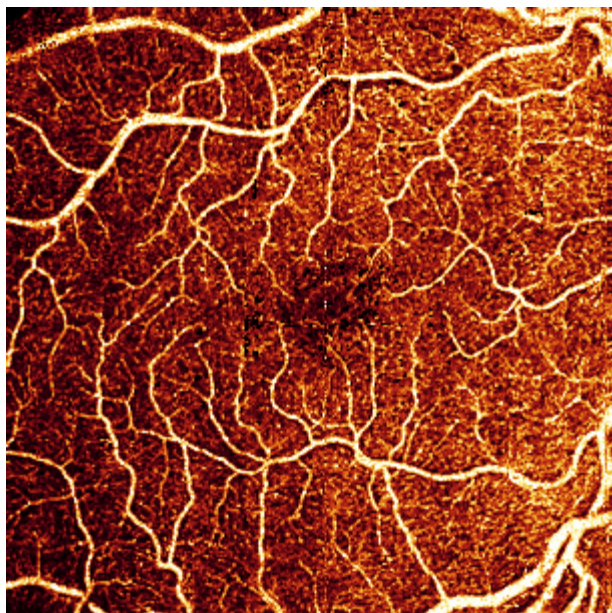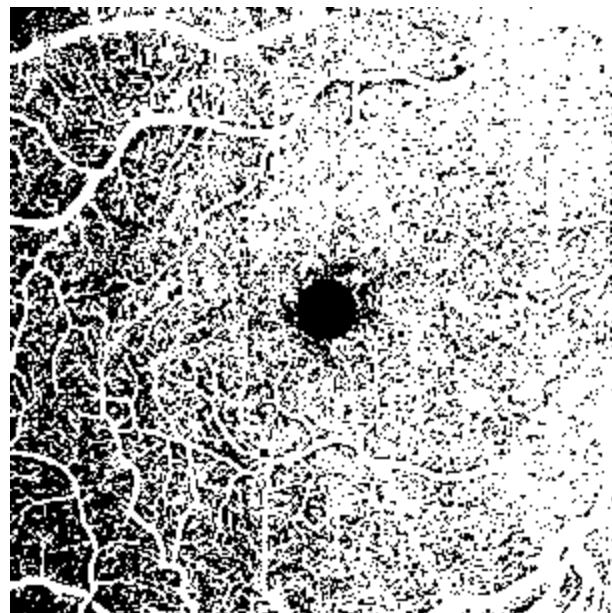

# Normal SVC case 4

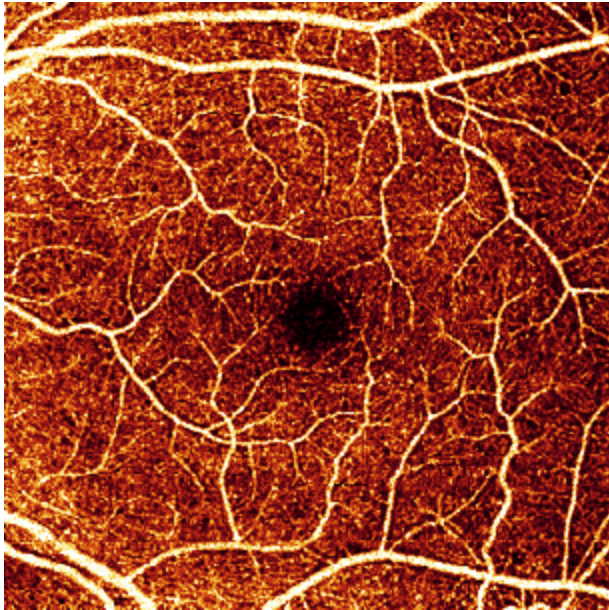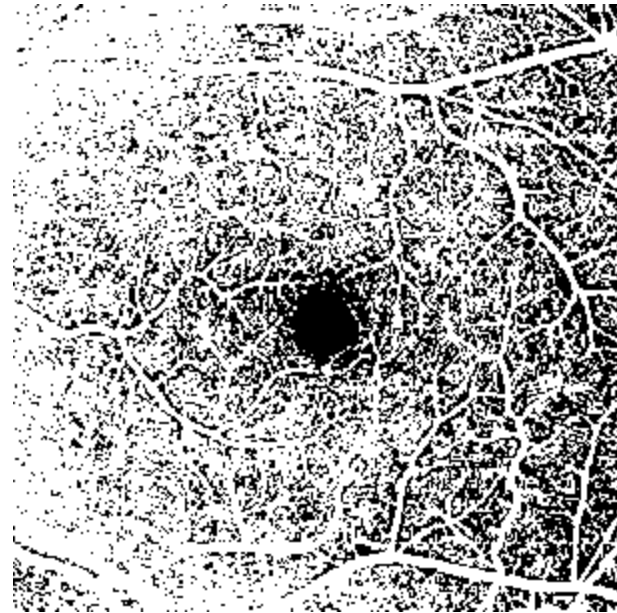

# Normal SVC Case5

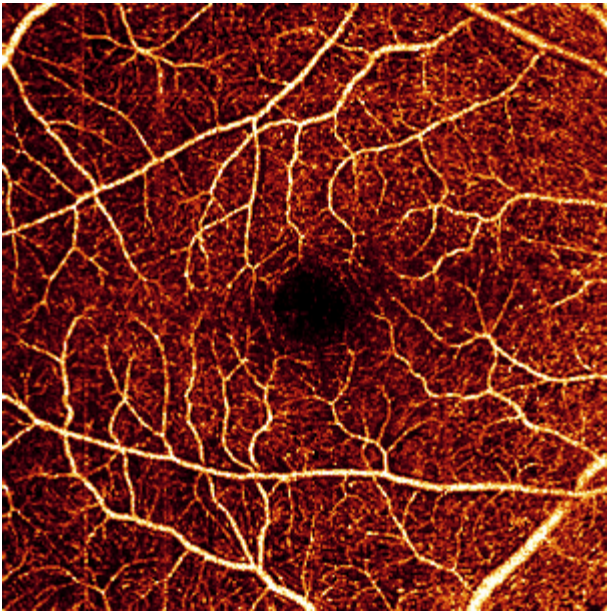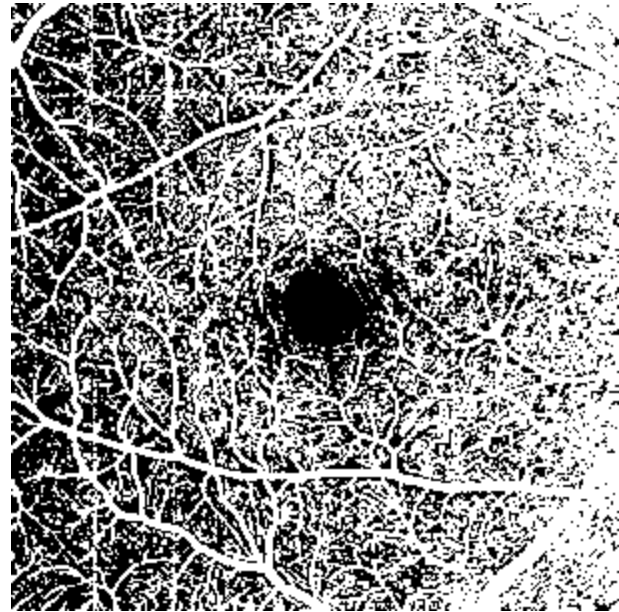

# Normal ICP Case 1

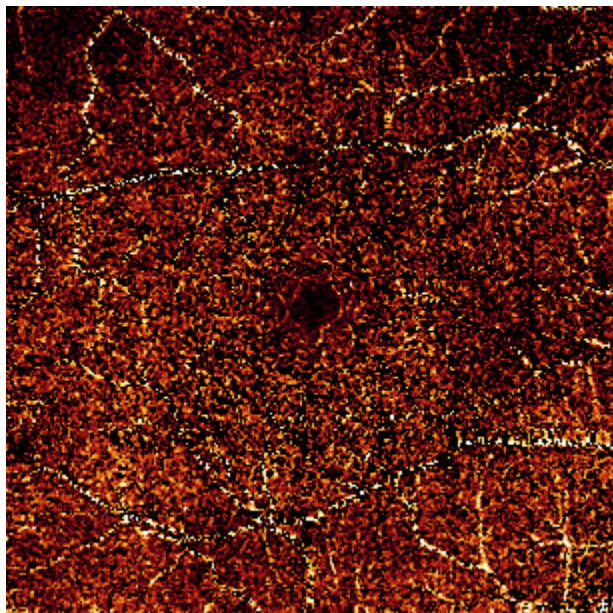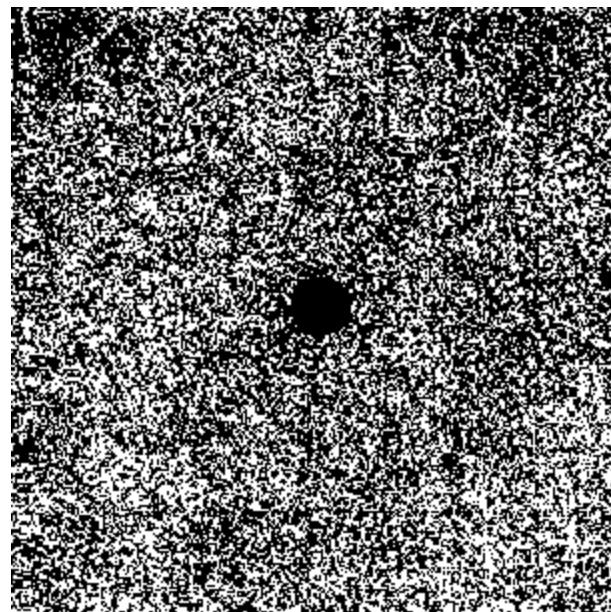

# Normal ICP Case 2

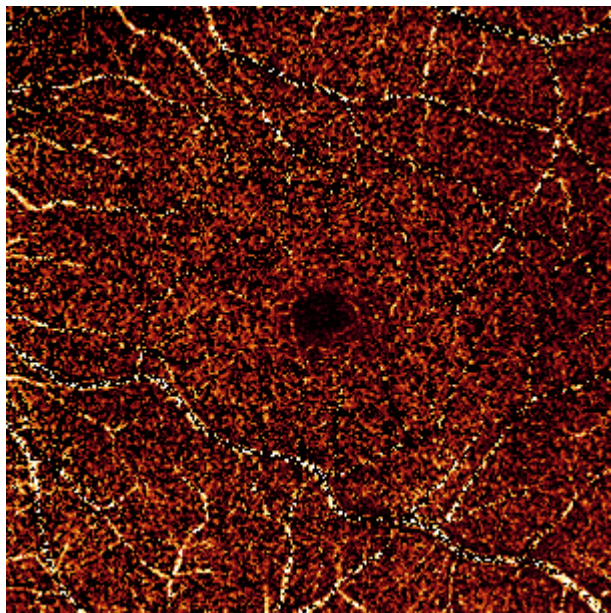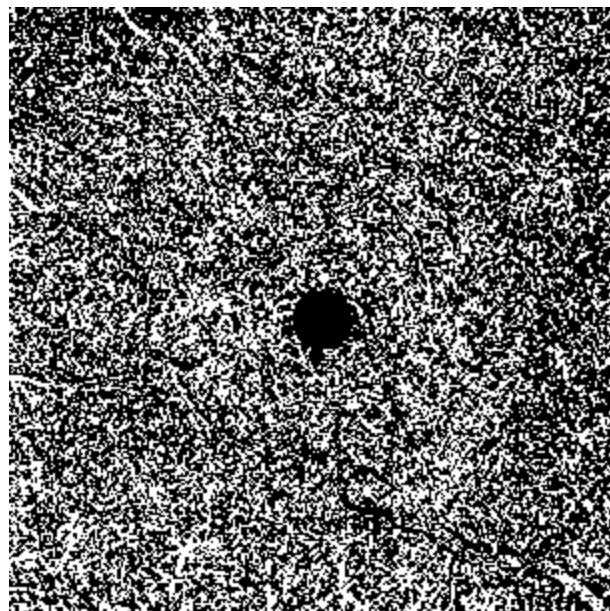



# Normal ICP Case3

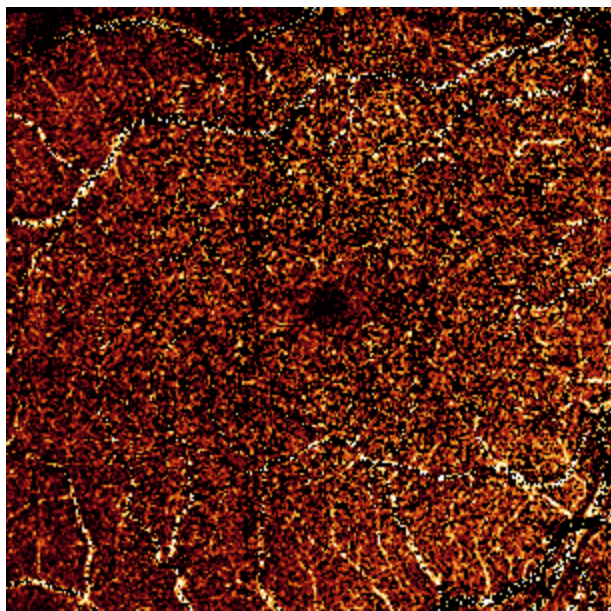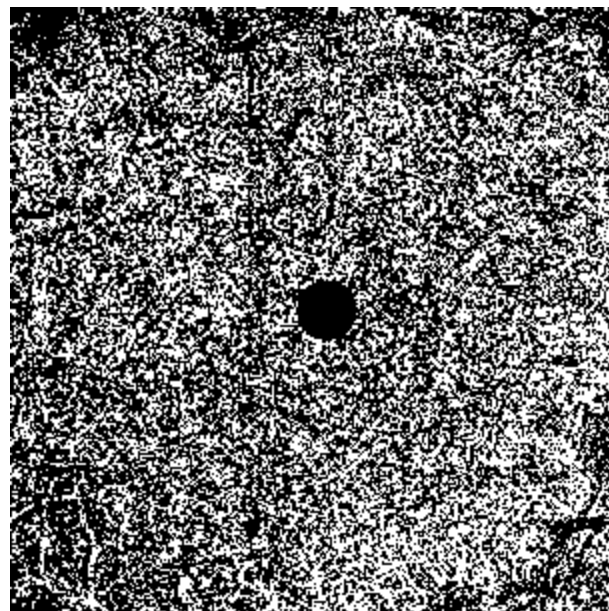

# Normal ICP case 4

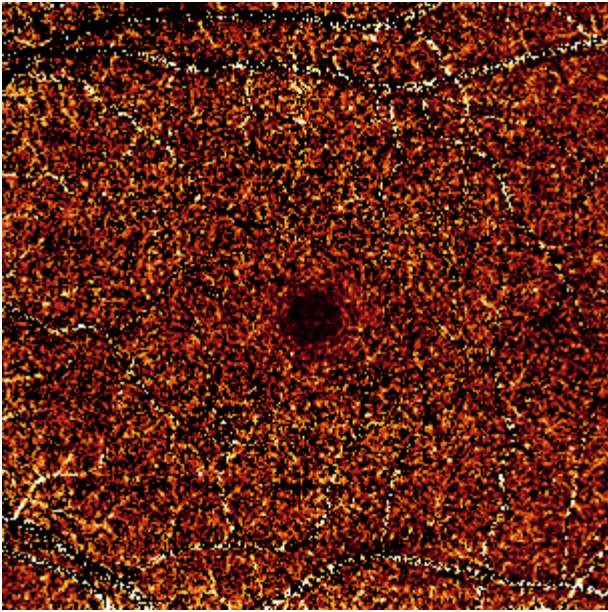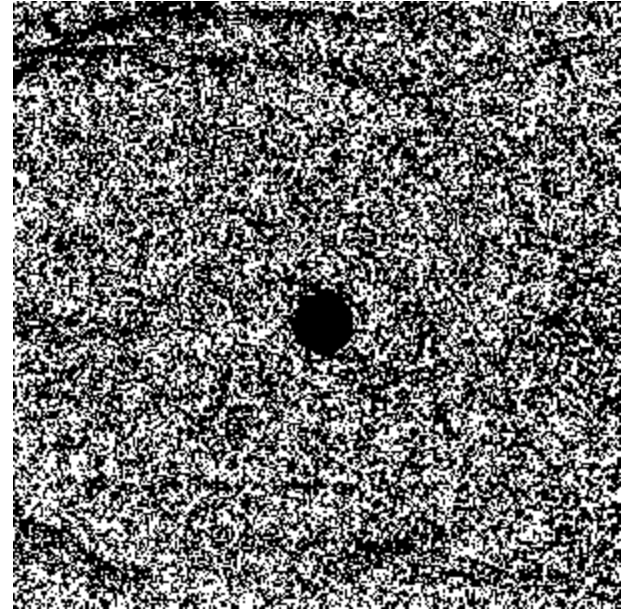

# Normal ICP Case5

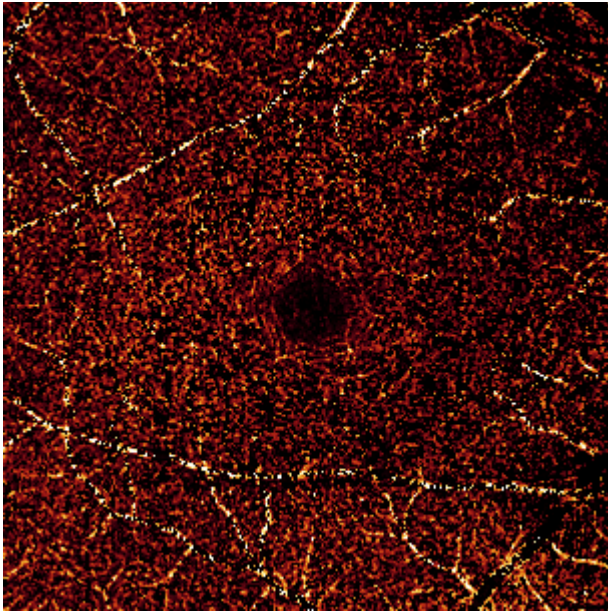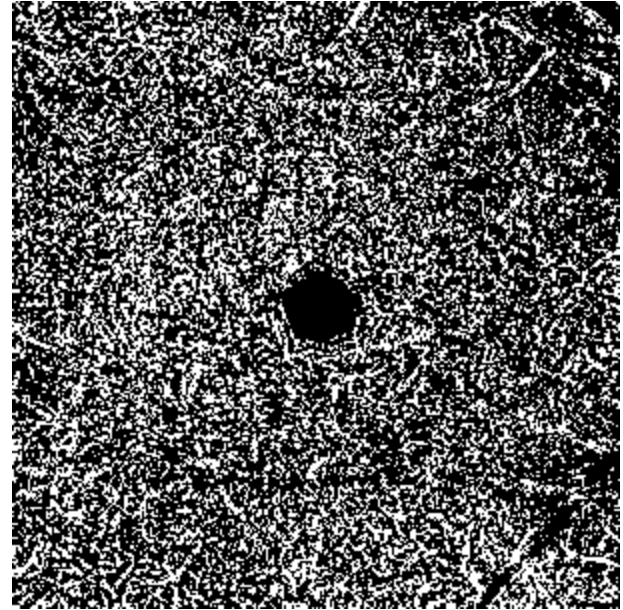

# Normal DCP Case 1

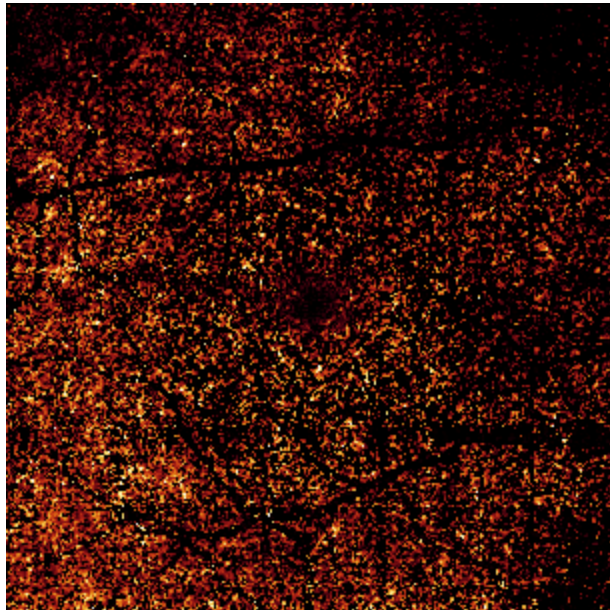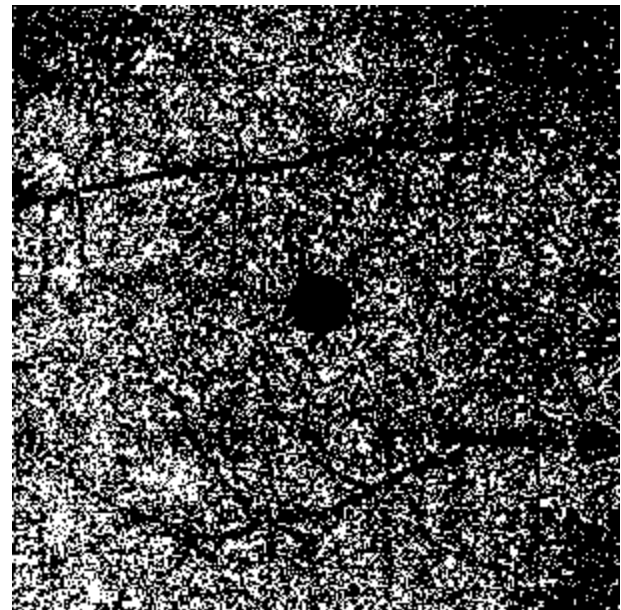

# Normal DCP Case 2

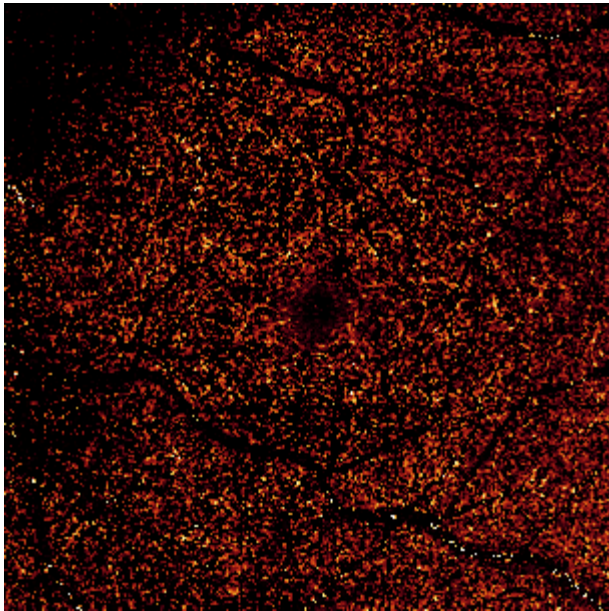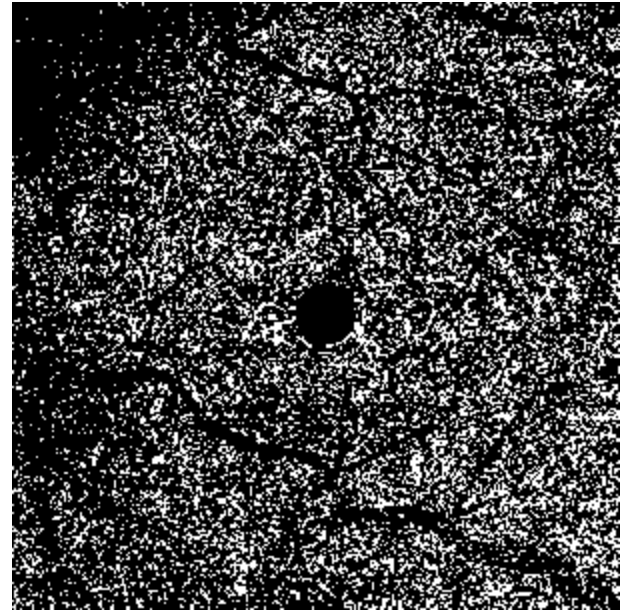

# Normal DCP Case3

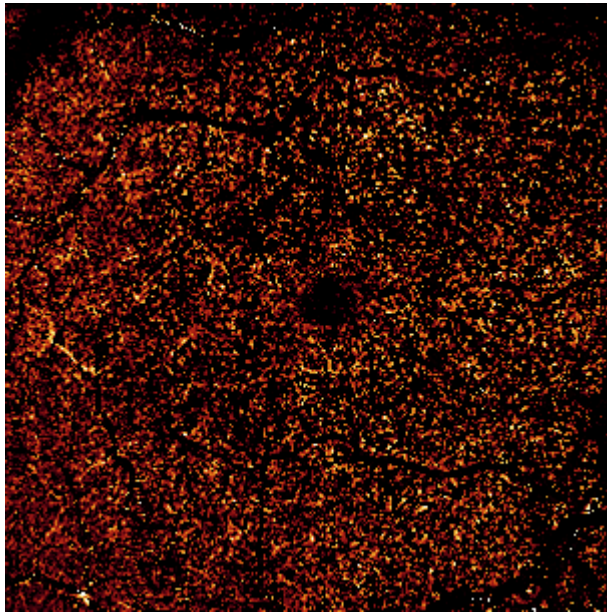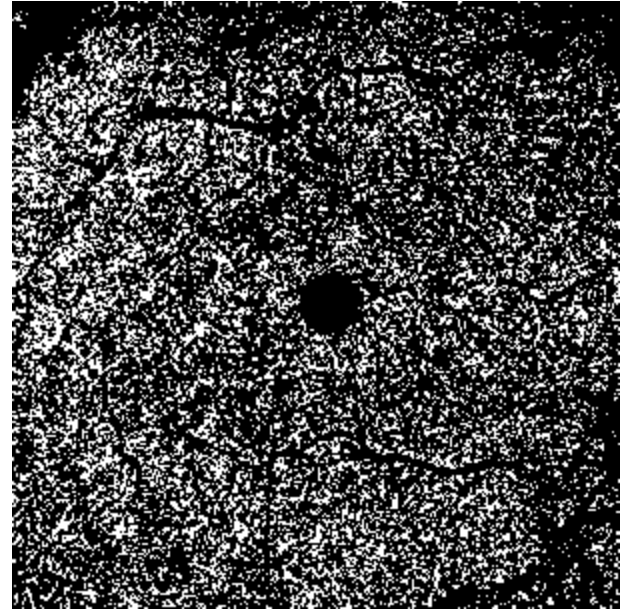

# Normal DCP case 4

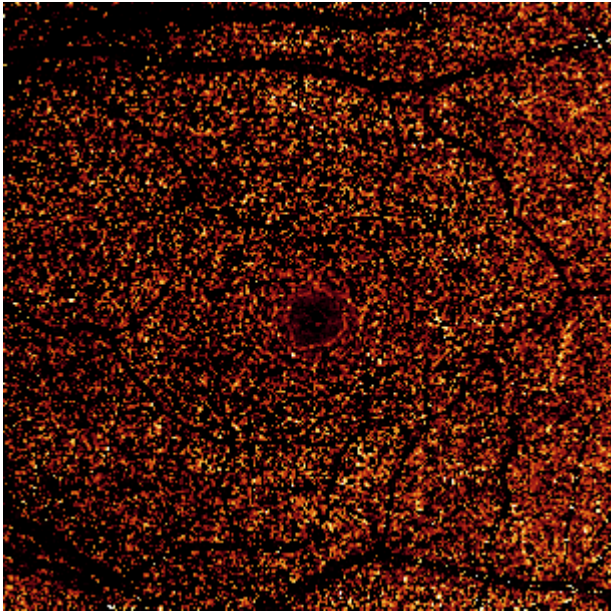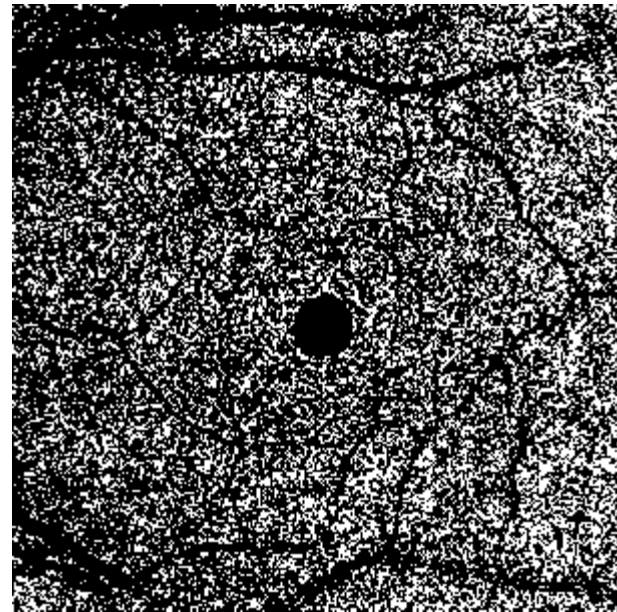

# Normal DCP Case5

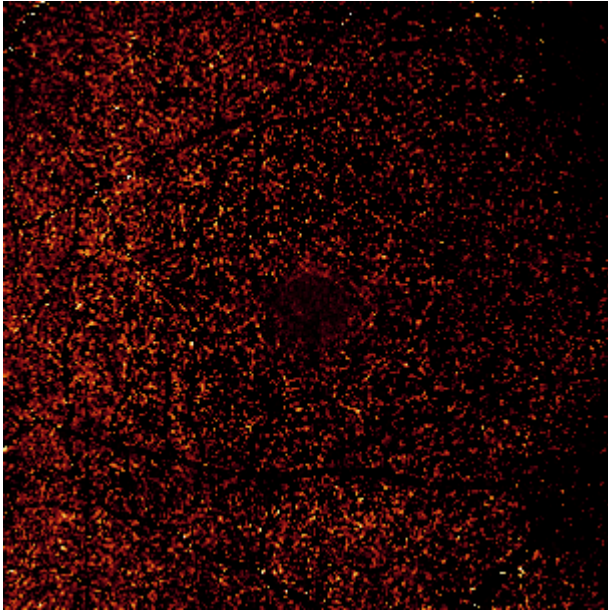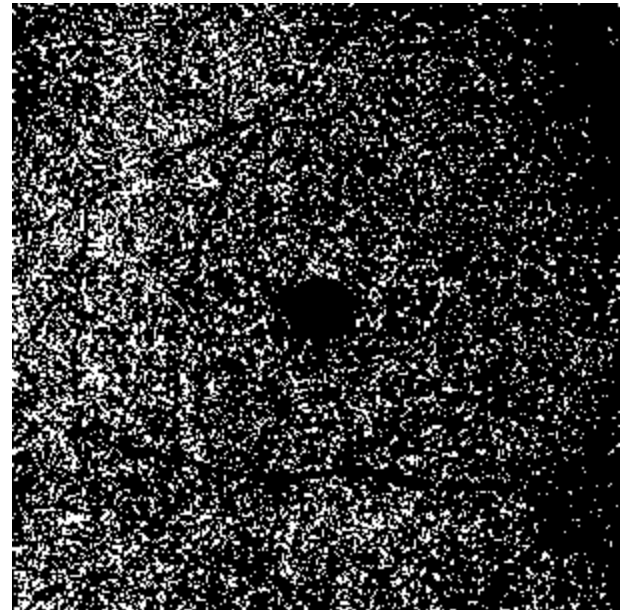

Supplement: NIHMS890099-supplement.pdf [file NIHMS890099-supplement.pdf]
